# Supplementary material for: Proteome Profiling of Brain Vessels in a Mouse Model of Cerebrovascular Pathology
Source: MDPI journal article supplement (doi:10.3390/biology12121500), 2023-12-07
Supplement: s1 [file s1]

## Supplementary Material

### Cerebrovascular Proteomics Workflow

#### Protein Extraction from Cerebral Arteries

Briefly, 100  $\mu$ L of 0.2% (*w/v*) Rapigest SF (Waters, Milford, MA, USA) in 50 mM ammonium bicarbonate was added to each of the three biological replicates and subjected to three, short pulses (20 sec each) of sonication for protein solubilization using a probe sonicator (550 Sonic Dismembrator; Fisher Scientific, Ottawa, ON, Canada), followed by incubation (95 °C dry bath, 10 min), and centrifugation (20 min, 10,000 $\times$  g). The supernatant (S0) containing Rapigest SF-solubilized proteins was transferred to a new tube, and 20  $\mu$ L removed for (a) total protein content analyses, and (b) to run a 1D, 12% SDS-PAGE gel. Conversely, the pellet was resuspended in 50  $\mu$ L of buffered collagenase (0.1 mg/mL crude collagenase, 50 mM Tris, pH 7.5, 2 mM CaCl<sub>2</sub>) and incubated (60 min at 37 °C) to further solubilize extracellular matrix and membrane proteins. Thereafter, 80  $\mu$ L of sample-specific S0 was added to the above mix, and the entire mixture sonicated three times (30 s each), followed by incubation (10 min, 95 °C), and centrifugation (20 min, 10,000 $\times$  g). The final supernatant (S1) containing solubilized cerebral arterial proteins was collected.

#### Protein Digest

Proteins in each S1 supernatant were denatured in 100 mM 2-mercaptoethanol (10 min, 95 °C). Following a 2 min cool down at room temperature (RT), 6  $\mu$ L of N-Glycosidase F

(Roche, Cat. # 11365185001) was added to each sample and incubated overnight at 37 °C to deglycosylate glycoproteins, which increases detection of membrane and secreted proteins by mass spectrometry [1]. Thereafter, each sample was reduced in fresh 4 mM dithiothreitol (10 min at 95 °C), and then alkylated in the dark in 10 mM freshly prepared iodoacetamide (30 min at RT). Subsequently, each sample was diluted to 450 µL with Milli-Q water and 5 µL of trypsin enzyme stock solution (Trypsin Gold, mass spectrometry grade, Promega, Cat. # V5280) added, and then incubated overnight (37 °C).

#### Maximizing Proteome Coverage

As described in detail previously [1,2], we used gel-free proteomics to maximize cerebral arterial proteome coverage. Specifically, tryptic-digest of each S1 protein mix was followed by fractionation of peptides by strong cation exchange [3], and eluted peptide fractions collected from low to high salt-containing cation exchange elution buffer concentration, by slowly injecting (~1 drop/s) 0.5 mL of each elute buffer. Specifically, peptide fractions were collected at 20%, 40% and 100% elution buffer concentrations [3].

#### Mass Spectrometry Analysis

For all 18 samples, each strong cation exchange fraction was analyzed by nanoLC-MS/MS, culminating in a grand total of 162 runs. Specifically, each fraction was analyzed using ESI-LTQ-Orbitrap-XL mass spectrometer (Thermo) coupled to a NanoAcquity UPLC system (Waters, Milford, MA), as previously described [1,2].

### *Protein Identification and Bioinformatics*

The raw data was converted to mzXML and MGF (Mascot generic format) format files using Msconvert (<https://proteowizard.sourceforge.io/>). The resulting MS/MS (tandem mass spectrometry) spectra were searched against *Mus musculus* Swiss-Prot database using Mascot v2.2.0 search engine [4] for protein identification with the following parameters: enzyme = trypsin; modifications = C (carbamidomethyl, fixed), M (oxidation, variable); peptide tolerance = 1.5 Da; fragment tolerance = 1.5 Da; one missed cleavage allowed). Decoy database searches were used to estimate the false positive identification rate of peptides. Peptides with a delta mass >15 ppm and score < 35 were removed and this yielded a false positive identification rate of 1%. In addition, Peptide Prophet probabilities, an independent statistical measure of peptide identification, yielded  $p \geq 0.95$  for all identified peptides. To extract quantitative MS (mass spectrometry) data, to align all runs and integrate protein search results, in-house software MatchRx 2 version QnD-2.0 was used. Peptide intensity validation was performed using MSight software version 1.0 (<http://www.expasy.ch/MSight>). The intensities of the peptides in each sample were normalized using median normalization to correct for run-to-run variability and possible unequal injections of the samples. Only peptides that were matched among all the samples were used for normalization. Median intensity of the matched peptides for each run ( $M_i$ ) and for all the runs ( $M_a$ ) were calculated and the intensity of each peptide (matched and unmatched) was normalized as follows: Normalized intensity = (Original

intensity)  $\times$  Ma/Mi.

## Supplemental Figures

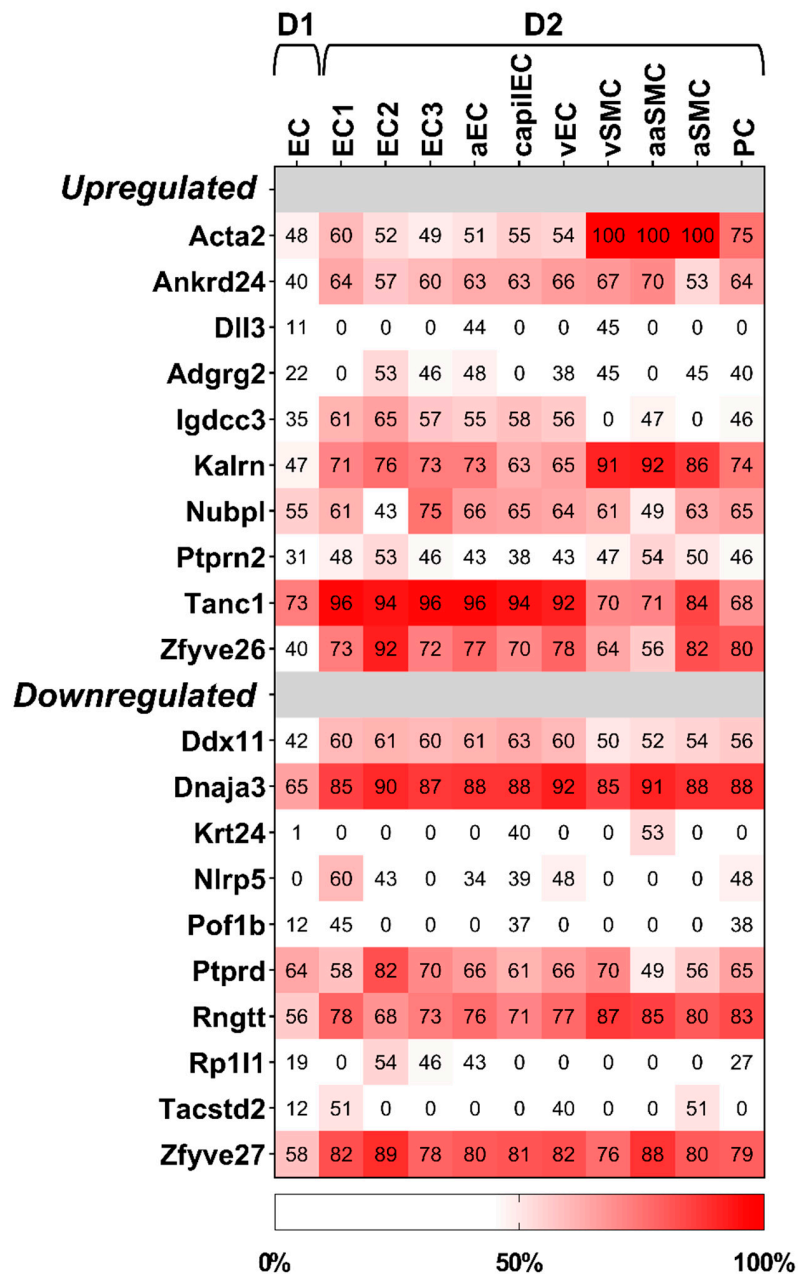

**Supplemental Figure S1. Relative gene expression of List 2 proteins in public vascular datasets.** Relative gene expression of the 20 List 2 proteins in mouse cerebrovascular

single cell transcriptome databases D1 [5] and D2 [6]. Abbreviations: EC, endothelial cell; aEC, arterial EC; capilEC, capillary EC; vEC, venular EC; vSMC, venular smooth muscle cell; aaSMC, arteriole SMC; aSMC, arterial SMC; PC, pericyte. This figure is duplicated from Figure 4 except raw values are on the heat map.

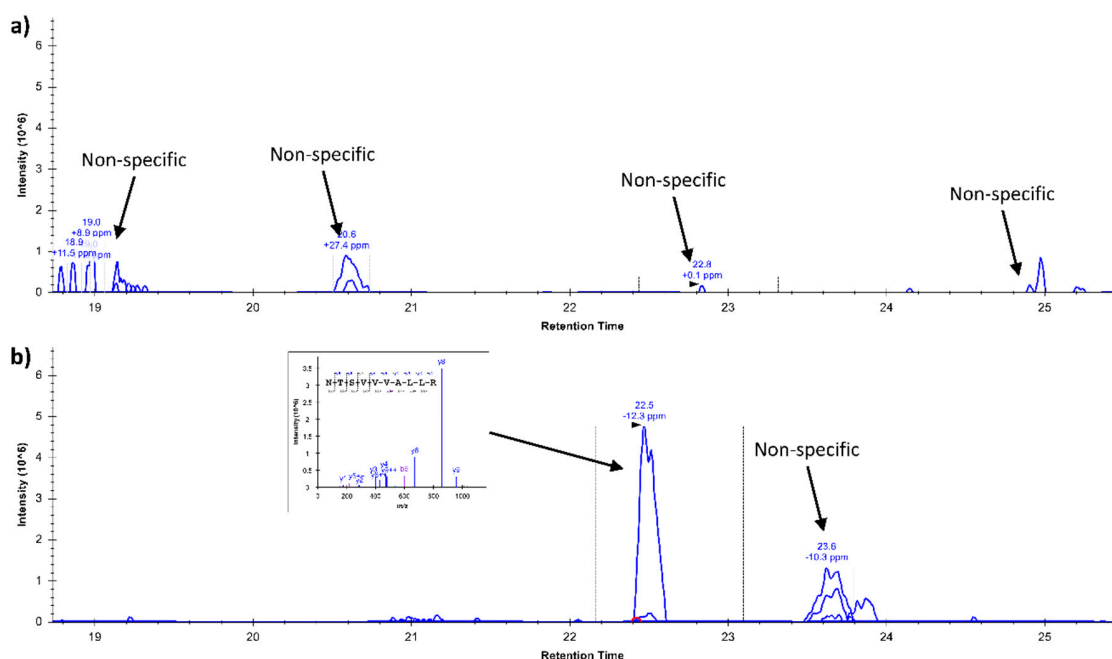

**Supplemental Figure S2. Examples of extracted ion-chromatograms and MS/MS spectra in precleared plasma and depleted plasma. (a,b)** An example of extracted ion-chromatogram for a TANC1 peptide in non-depleted (a) and depleted (b) plasma. Arrows indicate either non-specific peaks or specific peak. TANC1-specific peak was only detected in depleted plasma (b) as confirmed by its MS/MS spectra.



detected in total EVs (**b**) as confirmed by its MS/MS spectra. (**c,d**) An example of extracted ion-chromatogram for an KALRN peptide in non-depleted plasma (**c**) and total EVs (**d**). Arrows indicate either non-specific peaks or specific peak. KALRN-specific peak was only detected in total EVs (**d**) as confirmed by its MS/MS spectra.

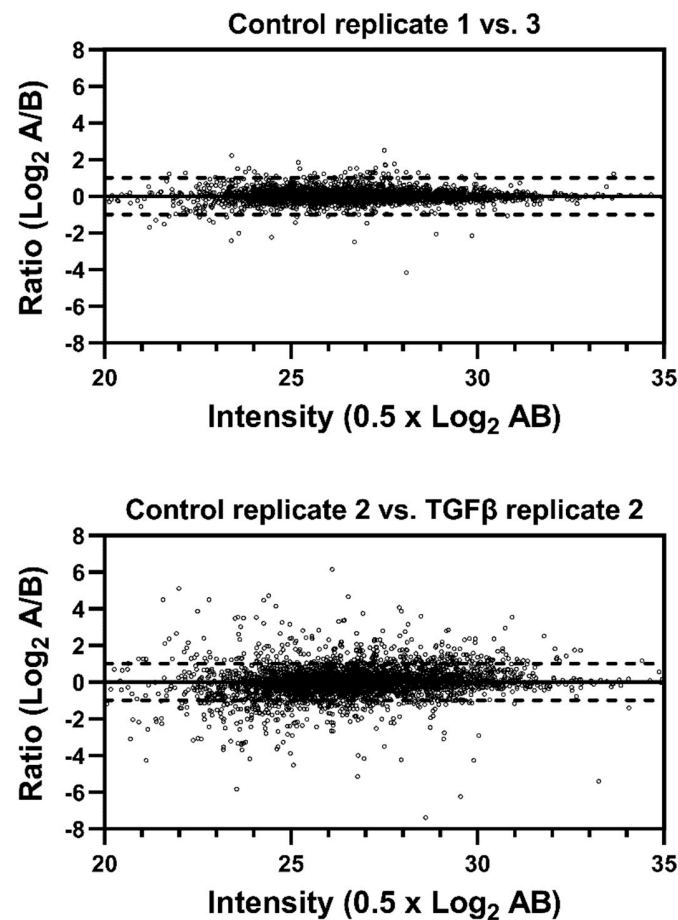

**Supplemental Figure S4.** The figure shows the reproducibility between two biological runs of control animals (**top panel**) and between control and TGFbeta runs (**bottom panel**). The median relative standard deviation among replicates of control and TGFbeta is 10.1% and 15.7%, respectively and between control and TGFbeta samples is 26%.

## Supplemental Tables

Supplementary Table S1. List 1 and List 2 proteins \*

| Uniprot (ID) | Gene     | Gene (Synonyms)      | Protein Name (Recommended)                                                         | Log2 fold Change | EVs |   |   |   |
|--------------|----------|----------------------|------------------------------------------------------------------------------------|------------------|-----|---|---|---|
|              |          |                      |                                                                                    |                  | M   |   | H |   |
|              |          |                      |                                                                                    |                  | p   | r | p | r |
| Q3UHH0       | Aak1     | Kiaa1048             | AP2-associated protein kinase 1                                                    | -1.09            | X   |   | X | X |
| P62737       | Acta2    | Actsa, Actvs         | Actin, aortic smooth muscle                                                        | 1.05             | X   |   | X | X |
| Q8CJ12       | Adgrg2   | Gpr64, Me6           | Adhesion G-protein coupled receptor G2                                             | 4.69             | X   |   | X | X |
| Q80VM7       | Ankrd24  | -                    | Ankyrin repeat domain-containing protein 24                                        | 1.08             |     |   | X |   |
| Q8BVM2       | Antxrl   | -                    | Anthrax toxin receptor-like                                                        | -1.61            |     |   |   |   |
| O88879       | Apaf1    | -                    | Apoptotic protease-activating factor 1                                             | -1.33            | X   |   | X | X |
| Q9Z1K5       | Arih1    | Ari, Ubch7bp         | E3 ubiquitin-protein ligase ARIH1                                                  | -1.3             |     |   | X | X |
| Q80VC9       | Camsap3  | Kiaa1543             | Calmodulin-regulated spectrin-associated protein 3                                 | -2.18            |     |   |   | X |
| Q80ZU5       | Ccdc181  | -                    | Uncharacterized Coiled-coil domain-containing protein 181 protein C1orf114 homolog | 1.33             |     |   |   |   |
| P06909       | Cfh      | Hf1                  | Complement factor H                                                                | 1.14             | X   |   | X | X |
| Q99388       | Csprs    | D1Lub1               | Component of Sp100-rs                                                              | -2.05            |     | X |   |   |
| Q02248       | Ctnnb1   | Catnb                | Catenin beta-1                                                                     | -1.32            | X   |   | X | X |
| A2AKB9       | Dcaf10   | Wdr32                | DDB1- and CUL4-associated factor 10                                                | -1.25            |     |   |   | X |
| Q91VR5       | Ddx1     | -                    | ATP-dependent RNA helicase DDX1                                                    | 1.11             | X   |   | X | X |
| Q6AXC6       | Ddx11    | -                    | Probable ATP-dependent RNA helicase DDX11                                          | -1.08            |     |   | X | X |
| Q9CWT6       | Ddx28    | -                    | Probable ATP-dependent RNA helicase DDX28                                          | 1.35             |     |   | X | X |
| Q9R0Z9       | Dlc1     | Arhgap7, Stard12     | Rho GTPase-activating protein 7                                                    | 1.71             |     |   | X | X |
| Q811D0       | Dlg1     | Dlgh1                | Disks large homolog 1                                                              | -1.46            | X   |   | X | X |
| O88516       | Dll3     | -                    | Delta-like protein 3                                                               | 1.48             |     |   | X | X |
| Q99M87       | Dnaja3   | Tid1                 | DnaJ homolog subfamily A member 3, mitochondrial                                   | -1.95            | X   |   | X | X |
| Q8BVG4       | Dpp9     | -                    | Dipeptidyl peptidase 9                                                             | 1.62             | X   |   | X | X |
| O70251       | Eef1b    | Eef1b2               | Elongation factor 1-beta                                                           | 1.51             | X   |   | X | X |
| O08810       | Eftud2   | Snrp116              | 116 kDa U5 small nuclear ribonucleoprotein component                               | -2.28            | X   |   | X | X |
| Q6DYE8       | Enpp3    | -                    | Ectonucleotide pyrophosphatase/phosphodiesterase family member 3                   | 1.01             | X   |   | X |   |
| Q9D281       | Fam114a1 | Noxp20               | Protein Noxp20                                                                     | -1.54            |     |   | X |   |
| Q8K285       | Fcho1    | -                    | F-BAR domain only protein 1                                                        | -1.65            |     |   | X | X |
| Q8CG64       | Fkrp     | -                    | Ribitol 5-phosphate transferase FKRP                                               | 1.01             | X   |   |   | X |
| Q7TQ32       | Hjv      | Hfe2, Rgmc           | Hemojuvelin                                                                        | -1.84            |     |   |   |   |
| Q8R0J8       | Idnk     | -                    | Probable gluconokinase                                                             | 1.03             |     |   | X | X |
| Q8BQC3       | Igdec3   | Punc                 | Immunoglobulin superfamily DCC subclass member 3                                   | 1.46             |     |   |   | X |
| Q920Q8       | Ivns1abp | Kiaa0850, Nd1, Nd1L, | Influenza virus NS1A-binding protein homolog                                       | -1.55            |     |   |   | X |



|        |          |                      |                                                                                    |       |   |   |   |   |
|--------|----------|----------------------|------------------------------------------------------------------------------------|-------|---|---|---|---|
|        |          | Nd1S, Ns1,<br>Ns1bp  |                                                                                    |       |   |   |   |   |
| A2CG49 | Kalrn    | -                    | Kalirin                                                                            | 1.02  |   |   | X | X |
| Q03719 | Kcnd1    | -                    | Potassium voltage-gated channel subfamily D member 1                               | -1.75 |   |   | X | X |
| P28740 | Kif2a    | Kif2, Kns2           | Kinesin-like protein KIF2A                                                         | -1.12 | X |   | X | X |
| Q8VCK5 | Klhl20   | Kiaa4210,<br>Kleip   | Kelch-like protein 20                                                              | -1.15 |   |   | X | X |
| A1L317 | Krt24    | Ka24                 | Keratin, type I cytoskeletal 24                                                    | -1.02 | X |   | X |   |
| Q0P5X1 | Lrriq1   | -                    | Leucine-rich repeat and IQ domain-containing protein 1                             | -1.14 | X |   | X |   |
| Q9QYR6 | Map1a    | Mtap1,<br>Mtap1a     | Microtubule-associated protein 1A                                                  | -1.74 |   |   | X | X |
| Q9WUU9 | Mcm3ap   | Ganp, Map80          | Germinal-center associated nuclear protein                                         | -1.06 |   |   | X | X |
| Q6PDC8 | Mfsd4    |                      | Major facilitator superfamily domain-containing protein 4                          | 1.78  |   |   | X |   |
| P97479 | Myo7a    | Myo7                 | Unconventional myosin-VIIa                                                         | -1.51 | X |   | X |   |
| Q9D5Y0 | na       | -                    | Uncharacterized protein C7orf31 homolog                                            | 1.39  |   |   |   |   |
| Q9CQH3 | Ndufb5   | -                    | NADH dehydrogenase [ubiquinone] 1 beta subcomplex subunit 5, mitochondrial         | -1.4  | X |   | X | X |
| Q9R1M5 | Nlrp5    | Mater, Nalp5         | NACHT, LRR and PYD domains-containing protein 5                                    | -1.05 |   |   |   |   |
| Q9CWD8 | Nubpl    | -                    | Iron-sulfur protein NUBPL                                                          | 2.39  |   |   | X | X |
| Q6P3D0 | Nudt16   | -                    | U8 snoRNA-decapping enzyme                                                         | -1.32 |   |   | X | X |
| Q61036 | Pak3     | Pak-3, Pakb,<br>Stk4 | Serine/threonine-protein kinase PAK 3                                              | -2.25 | X |   | X |   |
| P61249 | Pde6h    | -                    | Retinal cone rhodopsin-sensitive cGMP 3',5'-cyclic phosphodiesterase subunit gamma | -1.51 |   |   |   |   |
| Q8BUY9 | Pggt1b   | -                    | Geranylgeranyl transferase type-1 subunit beta                                     | -1.07 |   |   | X | X |
| P26450 | Pik3r1   | -                    | Phosphatidylinositol 3-kinase regulatory subunit alpha                             | -1.09 |   |   | X | X |
| Q8K4L4 | Pof1b    | -                    | Protein POF1B                                                                      | -1.76 |   |   | X |   |
| Q8R4S0 | Ppp1r14c | Kepi                 | Protein phosphatase 1 regulatory subunit 14C                                       | 1.27  |   |   |   | X |
| Q8BQ30 | Ppp1r18  | -                    | Phostensin                                                                         | 1.17  |   | X | X | X |
| Q0VGB7 | Ppp4r2   | -                    | Serine/threonine-protein phosphatase 4 regulatory subunit 2                        | -1.07 |   |   | X | X |
| Q91WG5 | Prkag2   | -                    | 5'-AMP-activated protein kinase subunit gamma-2                                    | 1.2   | X |   | X | X |
| Q64487 | Ptprd    |                      | Receptor-type tyrosine-protein phosphatase delta                                   | -1.45 | X |   | X |   |
| P80560 | Ptprn2   | -                    | Receptor-type tyrosine-protein phosphatase N2                                      | 1.23  |   |   |   | X |
| O55236 | Rngtt    | Cap1a                | mRNA-capping enzyme                                                                | -1.41 |   |   | X | X |
| Q8CGM2 | Rp1l1    | Rp1hl1               | Retinitis pigmentosa 1-like 1 protein                                              | -1.34 |   |   |   |   |
| O70258 | Sgce     | -                    | Epsilon-sarcoglycan                                                                | -1.97 | X |   | X | X |
| Q80W37 | Snupn    | Rnut1                | Snurportin-1                                                                       | -1.02 |   |   | X | X |
| Q505B8 | Syce2    | Cesc1                | Synaptonemal complex central element protein 2                                     | 1.07  |   |   |   |   |
| Q9CUU3 | Sycp2    | Scp2                 | Synaptonemal complex protein 2                                                     | -1.21 | X |   | X |   |

|        |                |                      |                                                        |       |   |  |   |   |
|--------|----------------|----------------------|--------------------------------------------------------|-------|---|--|---|---|
| Q8BGV3 | <b>Tacstd2</b> | Trop2                | Tumor-associated calcium signal transducer 2           | -1.31 |   |  | X |   |
| Q0VGY8 | <b>Tanc1</b>   | -                    | Protein TANC1                                          | 1.11  | X |  | X | X |
| Q7TQA6 | Tas2r38        | T2r31,<br>Tas2r138   | Taste receptor type 2 member 38                        | 1.31  |   |  |   |   |
| P70325 | Tbx4           | -                    | T-box transcription factor TBX4                        | 1.63  |   |  |   |   |
| A8C756 | Thada          | Kiaa1767             | Thyroid adenoma-associated protein homolog             | 2.62  |   |  | X | X |
| P39447 | Tjp1           | Zo1                  | Tight junction protein ZO-1                            | -1.12 | X |  | X | X |
| Q6A070 | Togaram1       | Fam179b,<br>Kiaa0423 | TOG array regulator of axonemal microtubules protein 1 | 1.39  |   |  |   |   |
| Q9CYZ2 | Tpd52l2        | -                    | Tumor protein D54                                      | -1.09 | X |  | X | X |
| Q80VC6 | Trnau1ap       | Scep43,<br>Trspap1   | tRNA selenocysteine 1-associated protein 1             | 1.53  |   |  |   | X |
| Q8VCH8 | Ubxn4          | Ubx2,<br>Ubxdc1      | UBX domain-containing protein 4                        | 2.33  |   |  | X | X |
| Q9JKB1 | Uchl3          | -                    | Ubiquitin carboxyl-terminal hydrolase isozyme L3       | -2.1  | X |  | X | X |
| Q91YD6 | Vill           | Villp                | Villin-like protein                                    | -1.11 |   |  | X | X |
| Q8BYK8 | Zc3h6          | Zc3hdc6              | Zinc finger CCH domain-containing protein 6            | -1.12 |   |  | X |   |
| Q5DU37 | <b>Zfyve26</b> | Kiaa0321             | Zinc finger FYVE domain-containing protein 26          | 1.13  |   |  | X | X |
| Q3TXX3 | <b>Zfyve27</b> | -                    | Protrudin                                              | -1.56 |   |  | X | X |

\* List 2 proteins are highlighted in yellow. Note that the Vesiclepedia database, was

used to identify List 1 and 2 proteins detected in the TGF cerebrovasculature, and also

detected in human extracellular vesicles. Abbreviations: na, not available; EVs,

extracellular vesicles; M, mouse; H, human; p, protein; r, mRNA.

#### Supplementary Table S2. EV markers detected \*

| Accession, Protein                                  | Symbol  | Undepleted Plasma | Total Plasma EV                     |
|-----------------------------------------------------|---------|-------------------|-------------------------------------|
| P60033, CD81 antigen                                | CD81    | Not detected      | Detected                            |
| P21926, CD9 antigen                                 | CD9     | Not detected      | Detected                            |
| Q8WUM4, Programmed cell death 6-interacting protein | PDCD6IP | Not detected      | Detected                            |
| P01023, Alpha-2-macroglobulin                       | A2M     | Detected          | Detected                            |
| P60709, Actin, cytoplasmic 1                        | ACTB    | Not detected      | Detected                            |
| P63261, Actin, cytoplasmic 2                        | ACTG1   | Detected          | Detected                            |
| P02768, Albumin                                     | ALB     | Detected          | Detected but significantly depleted |
| P04075, Fructose-bisphosphate aldolase A            | ALDOA   | Detected          | Detected                            |
| P50995, Annexin A11                                 | ANXA11  | Not detected      | Detected                            |
| P07355, Annexin A2                                  | ANXA2   | Not detected      | Detected                            |
| P84077, ADP-ribosylation factor 1                   | ARF1    | Not detected      | Detected                            |

|                                                                          |          |              |          |
|--------------------------------------------------------------------------|----------|--------------|----------|
| P05023, Sodium/potassium-transporting ATPase subunit alpha-1             | ATP1A1   | Not detected | Detected |
| P78371, T-complex protein 1 subunit beta                                 | CCT2     | Not detected | Detected |
| P60953, Cell division control protein 42 homolog                         | CDC42    | Not detected | Detected |
| P23528, Cofilin-1                                                        | CFL1     | Detected     | Detected |
| O00299, Chloride intracellular channel protein 1                         | CLIC1    | Not detected | Detected |
| Q00610, Clathrin heavy chain 1                                           | CLTC     | Not detected | Detected |
| P06733, Alpha-enolase                                                    | ENO1     | Not detected | Detected |
| P15311, Ezrin                                                            | EZR      | Not detected | Detected |
| P21333, Filamin-A                                                        | FLNA     | Not detected | Detected |
| O75955, Flotillin-1                                                      | FLOT1    | Not detected | Detected |
| P04406, Glyceraldehyde-3-phosphate dehydrogenase                         | GAPDH    | Detected     | Detected |
| P50395, Rab GDP dissociation inhibitor beta                              | GDI2     | Not detected | Detected |
| P04899, Guanine nucleotide-binding protein G(i) subunit alpha-2          | GNAI2    | Not detected | Detected |
| P62873, Guanine nucleotide-binding protein G(I)/G(S)/G(T) subunit beta-1 | GNB1     | Not detected | Detected |
| P62879, Guanine nucleotide-binding protein G(I)/G(S)/G(T) subunit beta-2 | GNB2     | Not detected | Detected |
| P07900, Heat shock protein HSP 90-alpha                                  | HSP90AA1 | Not detected | Detected |
| P11021, Endoplasmic reticulum chaperone BiP                              | HSPA5    | Not detected | Detected |
| P11142, Heat shock cognate 71 kDa protein                                | HSPA8    | Detected     | Detected |
| P23229, Integrin alpha-6                                                 | ITGA6    | Detected     | Detected |
| P05556, Integrin beta-1                                                  | ITGB1    | Not detected | Detected |
| P00338, L-lactate dehydrogenase A chain                                  | LDHA     | Detected     | Detected |
| P07195, L-lactate dehydrogenase B chain                                  | LDHB     | Detected     | Detected |
| Q08380, Galectin-3-binding protein                                       | LGALS3BP | Detected     | Detected |
| Q08431, Lactadherin                                                      | MFGE8    | Not detected | Detected |
| P26038, Moesin                                                           | MSN      | Not detected | Detected |
| Q14764, Major vault protein                                              | MVP      | Not detected | Detected |
| P35579, Myosin-9                                                         | MYH9     | Not detected | Detected |
| P07737, Profilin-1                                                       | PFN1     | Detected     | Detected |
| P00558, Phosphoglycerate kinase 1                                        | PGK1     | Not detected | Detected |
| P14618, Pyruvate kinase PKM                                              | PKM      | Detected     | Detected |
| P62937, Peptidyl-prolyl cis-trans isomerase A                            | PPIA     | Not detected | Detected |
| Q06830, Peroxiredoxin-1                                                  | PRDX1    | Not detected | Detected |
| P32119, Peroxiredoxin-2                                                  | PRDX2    | Not detected | Detected |
| P62820, Ras-related protein Rab-1A                                       | RAB1A    | Not detected | Detected |
| P51148, Ras-related protein Rab-5C                                       | RAB5C    | Not detected | Detected |
| P51149, Ras-related protein Rab-7a                                       | RAB7A    | Not detected | Detected |
| P61006, Ras-related protein Rab-8A                                       | RAB8A    | Not detected | Detected |
| P61224, Ras-related protein Rap-1b                                       | RAP1B    | Detected     | Detected |
| P61586, Transforming protein RhoA                                        | RHOA     | Not detected | Detected |
| O00560, Syntenin-1                                                       | SDCBP    | Not detected | Detected |
| P08195, 4F2 cell-surface antigen heavy chain                             | SLC3A2   | Not detected | Detected |
| P27105, Stomatin                                                         | STOM     | Not detected | Detected |
| P02786, Transferrin receptor protein 1                                   | TFRC     | Detected     | Detected |
| P07996, Thrombospondin-1                                                 | THBS1    | Detected     | Detected |
| P60174, Triosephosphate isomerase                                        | TPI1     | Detected     | Detected |
| Q71U36, Tubulin alpha-1A chain                                           | TUBA1A   | Not detected | Detected |
| P68363, Tubulin alpha-1B chain                                           | TUBA1B   | Not detected | Detected |
| Q9BQE3, Tubulin alpha-1C chain                                           | TUBA1C   | Not detected | Detected |
| P22314, Ubiquitin-like modifier-activating enzyme 1                      | UBA1     | Not detected | Detected |

|                                                   |       |              |          |
|---------------------------------------------------|-------|--------------|----------|
| P55072, Transitional endoplasmic reticulum ATPase | VCP   | Not detected | Detected |
| P61981, 14-3-3 protein gamma                      | YWHAG | Not detected | Detected |
| Q04917, 14-3-3 protein eta                        | YWHAH | Not detected | Detected |
| P63104, 14-3-3 protein zeta/delta                 | YWHAZ | Detected     | Detected |

\* Shown are known proteins from the “Top 100 EV Proteins”, defined as proteins that are often identified in EVs (Vesiclepedia database) that were either detected in undepleted plasma and/or total plasma EV isolates by proteomics. Note that albumin is a negative marker for plasma EVs and was significantly depleted (>95%) in total plasma EV compared to the undepleted plasma. Additional MISEV guidelines [7] were also followed, including nanoparticle tracking analysis, to demonstrate the presence of EVs (Star et al., *in preparation*).

## Supplementary Table S3. Molecular Functions and Biological Processes of List 2 Proteins

in Mice and Human \*.

(a)

|                                           | ACTA2 |      | ANKRD24 |      | DIL3  |      | ADGRG2 |      | IGDCC3 |      | KALRN |      | NUBPL |      | PTPRN2 |      | TANC1 |      | ZFYVE26 |      |
|-------------------------------------------|-------|------|---------|------|-------|------|--------|------|--------|------|-------|------|-------|------|--------|------|-------|------|---------|------|
|                                           | Human | Mice | Human   | Mice | Human | Mice | Human  | Mice | Human  | Mice | Human | Mice | Human | Mice | Human  | Mice | Human | Mice | Human   | Mice |
| <b>MOLECULAR FUNCTIONS</b>                | Y     | Y    | Y       | Y    | Y     | Y    | Y      | Y    | Y      | Y    | Y     | Y    | Y     | Y    | Y      | Y    | Y     | Y    | Y       | Y    |
| dna binding                               |       |      |         |      |       |      |        |      |        |      |       |      |       |      |        |      |       |      |         |      |
| rna binding                               |       |      |         |      |       |      |        |      |        |      |       |      |       |      |        |      |       |      |         |      |
| catalytic activity                        |       |      |         |      |       |      |        |      |        |      |       |      |       |      |        |      |       |      |         |      |
| gtpase activity                           |       |      |         |      |       |      |        |      |        |      |       |      |       |      |        |      |       |      |         |      |
| structural molecule activity              |       |      |         |      |       |      |        |      |        |      | Y     | Y    |       |      |        |      |       |      |         |      |
| cytoskeletal protein binding              |       |      | Y       | Y    |       |      |        |      |        |      |       |      |       |      |        |      |       |      | Y       | Y    |
| lipid binding                             |       |      |         |      |       |      |        |      |        |      |       |      |       |      |        |      |       |      |         |      |
| transferase activity                      |       |      |         |      |       |      |        |      |        |      | Y     | Y    |       |      |        |      |       |      |         |      |
| hydrolase activity                        | Y     | Y    |         |      |       |      |        |      |        |      |       |      |       |      |        |      |       |      |         |      |
| molecular transducer activity             |       |      |         |      |       |      | Y      | Y    |        |      |       |      |       |      | Y      | Y    |       |      |         |      |
| molecular function regulator activity     |       |      |         |      |       |      |        |      |        |      | Y     | Y    |       |      | Y      | Y    |       |      |         |      |
| catalytic activity, acting on a protein   |       |      |         |      |       |      |        |      |        |      | Y     | Y    |       |      | Y      | Y    |       |      |         |      |
| catalytic activity, acting on dna         |       |      |         |      |       |      |        |      |        |      |       |      |       |      |        |      |       |      |         |      |
| catalytic activity, acting on rna         |       |      |         |      |       |      |        |      |        |      |       |      | Y     | Y    |        |      |       |      |         |      |
| molecular carrier activity                |       |      |         |      |       |      |        |      |        |      |       |      |       |      |        |      |       |      |         |      |
| transcription regulator activity          |       |      |         |      |       |      |        |      |        |      |       |      |       |      |        |      |       |      |         |      |
| atp-dependent activity                    |       |      |         |      |       |      |        |      |        |      |       |      |       |      |        |      |       |      |         |      |
| other molecular function                  | Y     | Y    |         |      | Y     | Y    |        |      |        |      | Y     | Y    | Y     | Y    |        |      |       |      | Y       | Y    |
| <b>BIOLOGICAL PROCESSES</b>               | Y     | Y    | Y       | Y    | Y     | Y    | Y      | Y    | Y      | Y    | Y     | Y    | Y     | Y    | Y      | Y    | Y     | Y    | Y       | Y    |
| mitotic cell cycle                        |       |      |         |      |       |      |        |      |        |      |       |      |       |      |        |      |       |      | Y       | Y    |
| cytokinesis                               |       |      |         |      |       |      |        |      |        |      |       |      |       |      |        |      |       |      |         |      |
| immune system process                     | Y     | Y    |         |      |       |      |        |      |        |      |       |      |       |      |        |      |       |      |         |      |
| muscle system process                     | Y     | Y    |         |      |       |      |        |      |        |      |       |      |       |      |        |      |       |      |         |      |
| circulatory system process                | Y     | Y    |         |      |       |      |        |      |        |      |       |      |       |      |        |      |       |      |         |      |
| dna replication                           |       |      |         |      |       |      |        |      |        |      |       |      |       |      |        |      |       |      |         |      |
| dna repair                                |       |      |         |      |       |      |        |      |        |      |       |      |       |      |        |      |       |      | Y       | Y    |
| dna recombination                         |       |      |         |      |       |      |        |      |        |      |       |      |       |      |        |      |       |      | Y       | Y    |
| chromatin organization                    |       |      |         |      |       |      |        |      |        |      |       |      |       |      |        |      |       |      |         |      |
| regulation of dna-templated transcription |       |      |         |      |       |      |        |      |        |      |       |      |       |      |        |      |       |      |         |      |
| protein folding                           |       |      |         |      |       |      |        |      |        |      |       |      |       |      |        |      |       |      |         |      |
| lipid metabolic process                   |       |      |         |      |       |      |        |      |        |      |       |      |       |      | Y      | Y    |       |      |         |      |
| sulfur compound metabolic process         |       |      |         |      |       |      |        |      |        |      |       |      |       |      |        |      |       |      |         |      |
| autophagy                                 |       |      |         |      |       |      |        |      |        |      |       |      | Y     | Y    |        |      |       |      | Y       | Y    |
| inflammatory response                     |       |      |         |      |       |      |        |      |        |      |       |      |       |      |        |      |       |      |         |      |
| mitochondrion organization                |       |      |         |      |       |      |        |      |        |      |       |      | Y     | Y    |        |      |       |      |         |      |
| cytoskeleton organization                 |       |      |         |      |       |      |        |      |        |      |       |      |       |      |        |      |       |      |         |      |
| lysosome organization                     |       |      |         |      |       |      |        |      | Y      | Y    |       |      |       |      |        |      |       |      | Y       | Y    |
| cell adhesion                             |       |      |         |      |       |      |        |      |        |      |       |      |       |      |        |      |       |      |         |      |
| programmed cell death                     |       |      |         |      |       |      |        |      |        |      |       |      |       |      |        |      |       |      |         |      |
| mma metabolic process                     |       |      |         |      |       |      |        |      |        |      |       |      |       |      |        |      |       |      |         |      |
| vesicle-mediated transport                |       |      |         |      |       |      |        |      |        |      | Y     | Y    |       |      |        |      |       |      |         |      |
| reproductive process                      |       |      |         |      |       |      | Y      | Y    |        |      |       |      |       |      |        |      |       |      |         |      |
| signaling                                 | Y     | Y    |         |      | Y     | Y    |        |      |        |      | Y     | Y    |       |      | Y      | Y    |       |      |         |      |
| cell differentiation                      | Y     | Y    | Y       | Y    | Y     | Y    |        |      |        |      | Y     | Y    |       |      |        |      | Y     | Y    |         |      |
| cell junction organization                |       |      |         |      |       |      |        |      |        |      |       |      |       |      |        |      |       |      |         |      |
| cilium organization                       |       |      |         |      |       |      |        |      |        |      |       |      |       |      |        |      |       |      |         |      |
| anatomical structure development          | Y     | Y    | Y       | Y    | Y     | Y    |        |      |        |      | Y     | Y    |       |      |        |      | Y     | Y    |         |      |
| cell motility                             | Y     | Y    |         |      |       |      |        |      |        |      |       |      |       |      |        |      |       |      |         |      |
| nervous system process                    |       |      | Y       | Y    |       |      |        |      | Y      | Y    |       | Y    |       |      |        |      | Y     | Y    |         |      |
| membrane organization                     |       |      |         |      |       |      |        |      |        |      |       |      |       |      |        |      |       |      |         |      |
| protein-containing complex assembly       |       |      |         |      |       |      |        |      |        |      |       |      | Y     | Y    |        |      |       |      |         |      |
| protein localization to plasma membrane   |       |      |         |      |       |      |        |      |        |      |       |      |       |      |        |      |       |      |         |      |
| defense response to other organism        |       |      |         |      |       |      |        |      |        |      |       |      |       |      |        |      |       |      |         |      |
| other biological process                  | Y     | Y    |         |      |       |      |        |      |        |      | Y     | Y    | Y     | Y    | Y      | Y    |       |      |         |      |

(b)

|                                           | DDX11<br>Human | Mice | DNAJA3<br>Human | Mice | KRT24<br>Human | Mice | NLRP5<br>Human | Mice | POF18<br>Human | Mice | PTPRD<br>Human | Mice | RNGTT<br>Human | Mice | RP111<br>Human | Mice | TACSTD2<br>Human | Mice | ZFYVE27<br>Human | Mice |
|-------------------------------------------|----------------|------|-----------------|------|----------------|------|----------------|------|----------------|------|----------------|------|----------------|------|----------------|------|------------------|------|------------------|------|
| <b>MOLECULAR FUNCTIONS</b>                | Y              | Y    | Y               | Y    | Y              | Y    | Y              | Y    | Y              | Y    | Y              | Y    | Y              | Y    | Y              | Y    | Y                | Y    | Y                | Y    |
| dna binding                               | Y              | Y    |                 |      |                |      |                |      |                |      |                |      |                |      |                |      |                  |      |                  |      |
| rna binding                               | Y              | Y    |                 |      |                |      |                |      |                |      |                |      |                |      |                |      |                  |      |                  |      |
| catalytic activity                        | Y              | Y    |                 |      |                |      |                |      |                |      |                |      |                |      |                |      |                  |      |                  |      |
| glucose activity                          |                |      |                 |      |                |      |                |      |                |      |                |      |                |      |                |      |                  |      |                  |      |
| structural molecule activity              |                |      | Y               | Y    | Y              | Y    |                | Y    | Y              | Y    |                |      |                |      |                |      |                  |      |                  |      |
| cytoskeletal protein binding              |                |      |                 |      |                |      |                |      |                |      |                |      |                |      |                |      |                  |      |                  |      |
| lipid binding                             |                |      |                 |      |                |      |                |      |                |      |                |      |                |      |                |      |                  |      |                  |      |
| transferase activity                      |                |      | Y               |      |                |      |                |      |                |      |                |      | Y              | Y    |                | Y    |                  |      |                  |      |
| hydrolase activity                        | Y              | Y    |                 |      |                |      |                |      |                |      |                | Y    | Y              |      | Y              |      |                  |      |                  |      |
| molecular transducer activity             |                |      |                 |      |                |      |                |      |                |      |                | Y    |                |      |                |      |                  |      |                  |      |
| molecular function regulator activity     |                |      | Y               | Y    |                |      |                |      |                |      |                |      |                |      |                |      |                  |      |                  |      |
| catalytic activity, acting on a protein   |                |      | Y               |      |                |      |                |      |                |      |                | Y    | Y              |      | Y              | Y    |                  |      |                  |      |
| catalytic activity, acting on dna         | Y              | Y    |                 |      |                |      |                |      |                |      |                |      |                |      |                |      |                  |      |                  |      |
| catalytic activity, acting on rna         |                |      |                 |      |                |      |                |      |                |      |                |      |                |      | Y              | Y    |                  |      |                  |      |
| molecular carrier activity                |                |      |                 |      |                |      |                |      |                |      |                |      |                |      |                |      |                  |      |                  |      |
| transcription regulator activity          |                |      | Y               |      |                |      |                |      |                |      |                |      |                |      |                |      |                  |      |                  |      |
| atp-dependent activity                    | Y              | Y    |                 |      |                |      |                |      |                |      |                |      |                |      |                |      |                  |      |                  |      |
| other molecular function                  | Y              | Y    | Y               | Y    |                |      | Y              | Y    |                |      | Y              | Y    | Y              | Y    |                |      |                  |      | Y                | Y    |
| <b>BIOLOGICAL PROCESSES</b>               | Y              | Y    | Y               | Y    | Y              | Y    | Y              | Y    | Y              | Y    | Y              | Y    | Y              | Y    | Y              | Y    | Y                | Y    | Y                | Y    |
| mitotic cell cycle                        |                |      |                 |      |                |      |                |      |                |      |                |      |                |      |                |      |                  |      |                  |      |
| cytokinesis                               |                |      |                 |      |                |      |                |      |                |      |                |      |                |      |                |      |                  |      |                  |      |
| immune system process                     |                |      | Y               | Y    |                |      |                |      |                |      |                |      |                |      |                |      |                  |      |                  |      |
| muscle system process                     |                |      |                 |      |                |      |                |      |                |      |                |      |                |      |                |      |                  |      |                  |      |
| circulatory system process                |                |      |                 |      |                |      |                |      |                |      |                |      |                |      |                |      |                  |      |                  |      |
| dna replication                           | Y              | Y    | Y               | Y    |                |      |                |      |                |      |                |      |                |      |                |      |                  |      |                  |      |
| dna repair                                | Y              | Y    |                 |      |                |      |                |      |                |      |                |      |                |      |                |      |                  |      |                  |      |
| dna recombination                         |                |      |                 |      |                |      |                |      |                |      |                |      |                |      |                |      |                  |      |                  |      |
| chromatin organization                    | Y              | Y    |                 |      |                |      |                |      |                |      |                |      |                |      |                |      |                  |      |                  |      |
| regulation of dna-templated transcription | Y              | Y    | Y               | Y    |                |      |                |      |                |      |                |      |                |      |                |      |                  |      |                  |      |
| protein folding                           |                |      | Y               | Y    |                |      |                |      |                |      |                |      |                |      |                |      |                  |      |                  |      |
| lipid metabolic process                   |                |      |                 |      |                |      |                |      |                |      |                |      |                |      |                |      |                  |      |                  |      |
| sulfur compound metabolic process         |                |      |                 |      |                |      |                |      |                |      |                |      |                |      |                |      |                  |      |                  |      |
| autophagy                                 |                |      |                 |      |                |      |                |      |                |      |                |      |                |      |                |      |                  |      |                  |      |
| inflammatory response                     |                |      |                 |      |                |      | Y              | Y    |                |      |                |      |                |      |                |      |                  |      |                  |      |
| mitochondrion organization                |                |      |                 |      |                |      |                |      |                |      |                |      |                |      |                |      |                  |      |                  |      |
| cytoskeleton organization                 |                |      | Y               | Y    | Y              | Y    | Y              | Y    | Y              | Y    |                |      |                |      | Y              | Y    | Y                | Y    |                  |      |
| lysosome organization                     |                |      |                 |      |                |      |                |      |                |      |                |      |                |      |                |      |                  |      |                  |      |
| cell adhesion                             |                |      | Y               | Y    |                |      |                |      |                |      | Y              | Y    |                |      |                |      | Y                | Y    |                  |      |
| programmed cell death                     |                |      | Y               | Y    |                |      |                |      |                |      |                |      |                |      |                |      |                  |      |                  |      |
| mma metabolic process                     |                |      |                 |      |                |      |                |      |                |      |                |      |                |      |                |      |                  |      |                  |      |
| vesicle-mediated transport                |                |      |                 |      |                |      | Y              | Y    |                |      |                |      | Y              | Y    |                |      |                  |      | Y                | Y    |
| reproductive process                      |                |      |                 |      |                |      | Y              | Y    |                |      |                |      |                |      |                |      |                  |      |                  |      |
| signaling                                 |                |      | Y               | Y    |                |      |                |      |                |      | Y              | Y    |                |      | Y              | Y    |                  |      | Y                | Y    |
| cell differentiation                      |                |      | Y               | Y    | Y              | Y    |                |      | Y              | Y    | Y              | Y    |                |      | Y              | Y    | Y                | Y    | Y                | Y    |
| cell junction organization                |                |      | Y               | Y    |                |      |                |      | Y              | Y    | Y              | Y    |                |      |                |      |                  |      |                  |      |
| cilium organization                       |                |      |                 |      |                |      |                |      |                |      |                |      |                |      |                |      |                  |      |                  |      |
| anatomical structure development          |                |      | Y               | Y    | Y              | Y    | Y              | Y    | Y              | Y    | Y              | Y    |                |      | Y              | Y    | Y                | Y    | Y                | Y    |
| cell motility                             |                |      |                 |      |                |      |                |      |                |      |                |      |                |      |                |      |                  |      |                  |      |
| nervous system process                    |                |      |                 |      |                |      |                |      |                |      |                |      |                |      | Y              | Y    | Y                | Y    |                  |      |
| membrane organization                     |                |      | Y               | Y    |                |      |                |      |                |      | Y              | Y    |                |      |                |      |                  |      |                  |      |
| protein-containing complex assembly       |                |      |                 |      |                |      |                |      | Y              |      |                |      |                |      |                |      |                  |      |                  |      |
| protein localization to plasma membrane   |                |      | Y               | Y    |                |      |                |      |                |      |                |      |                |      |                |      |                  |      | Y                | Y    |
| defense response to other organism        |                |      |                 |      |                |      |                |      |                |      |                |      |                |      |                |      |                  |      |                  |      |
| other biological process                  | Y              | Y    | Y               | Y    |                |      | Y              | Y    |                |      | Y              | Y    | Y              | Y    | Y              | Y    | Y                | Y    | Y                | Y    |

\* Shown are the known molecular functions and biological processes of the List 2 proteins (from Uniprot database) in mice and human. We have shown molecular functions and biological processes for (a) upregulated and (b) downregulated proteins in TGF mice.

## References

1. Badhwar, A.; Stanimirovic, D.B.; Hamel, E.; Haqqani, A.S. The Proteome of Mouse Cerebral Arteries. *J. Cereb. Blood Flow. Metab.* **2014**, *34*, 1033–1046.
2. Badhwar, A.; Brown, R.; Stanimirovic, D.B.; Haqqani, A.S.; Hamel, E. Proteomic Differences in Brain Vessels of Alzheimer's Disease Mice: Normalization by PPAR $\gamma$  Agonist Pioglitazone. *J. Cereb. Blood Flow Metab.* **2016**. <https://doi.org/10.1177/0271678X16655172>.
3. Haqqani, A.S.; Kelly, J.F.; Stanimirovic, D.B. Quantitative Protein Profiling by Mass Spectrometry Using Label-Free Proteomics. *Methods Mol. Biol.* **2008**, *439*, 241–256.
4. Hirosawa, M.; Hoshida, M.; Ishikawa, M.; Toya, T. MASCOT: Multiple Alignment System for Protein Sequences Based on Three-Way Dynamic Programming. *Comput. Appl. Biosci.* **1993**, *9*, 161–167.
5. Zhang, Y.; Sloan, C.K.; Bennett, S.A.; Scholze, M.L.; Keefe, O. An RNA-Sequencing Transcriptome and Splicing Database of Glia, Neurons, and Vascular Cells of the Cerebral Cortex. *J. Neurosci.* **2014**, *34*, 11929–11947.
6. Vanlandewijck, M.; He, L.; Mäe, M.A.; Andrae, J.; Ando, K.; Gaudio, D. A Molecular Atlas of Cell Types and Zonation in the Brain Vasculature. *Nature* **2018**, *554*, 475–480.
7. Théry, C.; Witwer, K.W.; Aikawa, E.; Alcaraz, M.J.; Anderson, J.D.; Andriantsitohaina, R.; Antoniou, A.; Arab, T.; Archer, F.; Atkin-Smith, G.K.; et al. Minimal Information for Studies of Extracellular Vesicles 2018 (MISEV2018): A Position Statement of the International Society for Extracellular Vesicles and Update of the MISEV2014 Guidelines. *J. Extracell. Vesicles* **2018**, *7*. <https://doi.org/10.1080/20013078.2018.1535750>.
